# Supplementary material for: Atomic Diffusivities of Yttrium, Titanium and Oxygen Calculated by Ab Initio Molecular Dynamics in Molten 316L Oxide-Dispersion-Strengthened Steel Fabricated via Additive Manufacturing
Source: MDPI journal article supplement (doi:10.3390/ma17071543), 2024-03-28
Supplement: s1 [file s1]

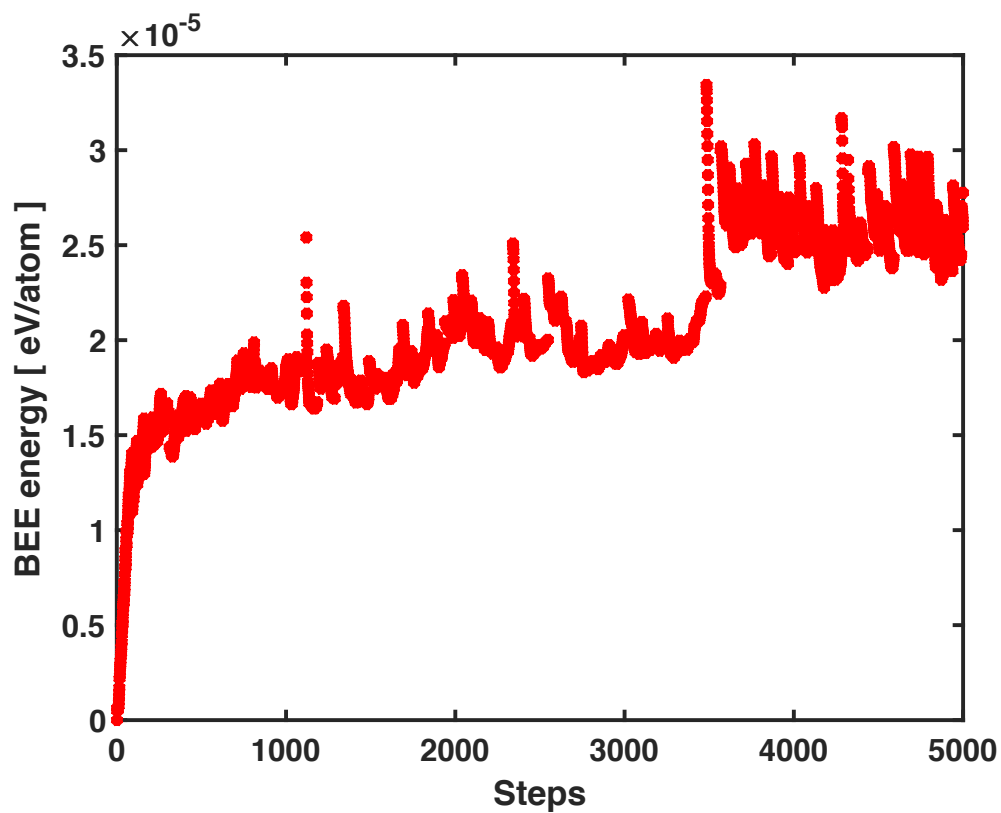

**Figure S1.** Bayesian error estimation (BEE) of energy per atom during machine learning of the force field (with temperature going from 1700 K to 2700 K). The error grows slowly with increasing steps (i.e., temperature) but overall well contained within a few times  $10^{-5}$  eV/atom.
